# Supplementary material for: Self-management interventions for adults living with Chronic Obstructive Pulmonary Disease (COPD): The development of a Core Outcome Set for COMPAR-EU project
Source: PLOS journal article supplement (doi:10.1371/journal.pone.0247522), 2021-03-01
Supplement: S3 (10.1371/journal.pone.0247522.s003) [file journal.pone.0247522.s003]

**Supplementary file 3. Consensus workshop participants characteristics – patients/patient representatives**

| <b>ID</b> | <b>Age</b> | <b>Gender</b> | <b>Education</b>                 | <b>Occupation</b>                                                              |
|-----------|------------|---------------|----------------------------------|--------------------------------------------------------------------------------|
| 2         | 45-54      | Female        | Master's degree or equivalent    | Patient advocate/patient representative affiliated with a patient organisation |
| 5         | > 65       | Male          | Master's degree or equivalent    | Individual patient affiliated with a patient organisation                      |
| 6         | > 65       | Male          | High school degree or equivalent | Individual patient affiliated with a patient organisation                      |
| 7         | 45-54      | Female        | Master's degree or equivalent    | Patient advocate/patient representative affiliated with a patient organisation |
| 9         | > 65       | Male          | Master's degree or equivalent    | Patient advocate/patient representative affiliated with a patient organisation |
